# Supplementary material for: Magnetic MOF composites for the electrocatalysis and biosensing of dopamine released from living cells
Source: Royal Society of Chemistry journal article supplement (doi:10.1039/d4tb00996g), 2024-01-01
Supplement: d4tb00996g1.pdf [file d4tb00996g1.pdf]

## Supporting Information

# Magnetic MOF composites for the electrocatalysis and biosensing of dopamine released from living cells

Jiarong Guo<sup>a</sup>, Ying Ma<sup>c</sup>, Tongyu Han<sup>d</sup>, Jiao Yang<sup>b,\*</sup>, Peng Miao<sup>a,\*</sup>

<sup>a</sup> *Suzhou Institute of Biomedical Engineering and Technology, Chinese Academy of Sciences, Suzhou 215163, China*

<sup>b</sup> *Institute of Clinical Medicine Research, Suzhou Hospital, Affiliated Hospital of Medical School, Nanjing University, Suzhou 215153, China*

<sup>c</sup> *Jiangsu Key Laboratory for Molecular and Medical Biotechnology, College of Life Sciences, Nanjing Normal University, Nanjing, 210023, China*

<sup>d</sup> *State Key Laboratory of Applied Organic Chemistry, College of Chemistry and Chemical Engineering, Lanzhou University, Lanzhou 730000, China*

\* Corresponding authors.

E-mail: yangjiaomed@126.com; miaopeng@sibet.ac.cn.

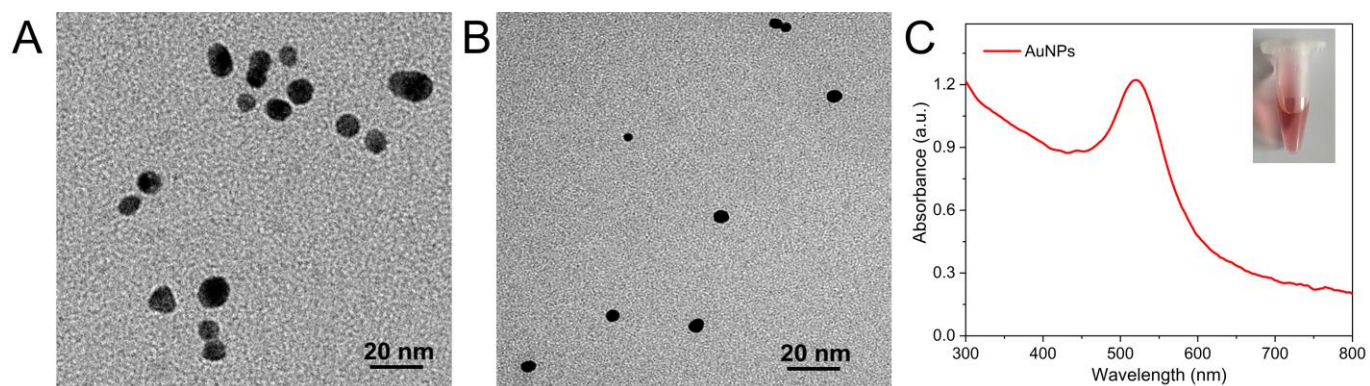

**Figure S1.** TEM images of (A)  $\text{Fe}_3\text{O}_4$  and (B) AuNPs. (C) UV-vis absorption spectrum of AuNPs. Inset is the picture under daylight.

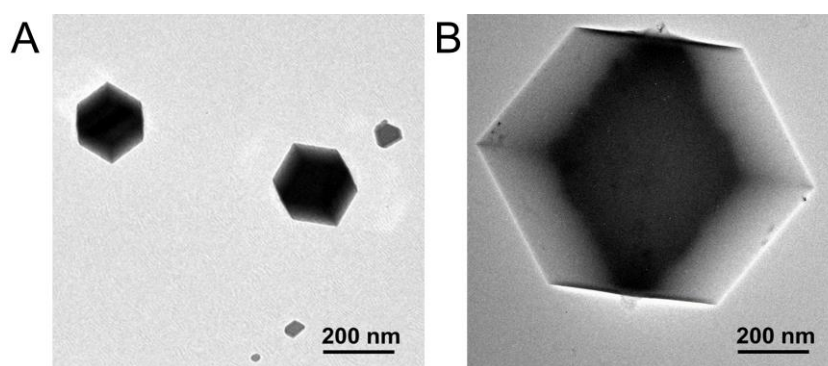

**Figure S2.** TEM images of (A) ZIF-8 and (B)  $\text{Fe}_3\text{O}_4$ @ZIF-8.

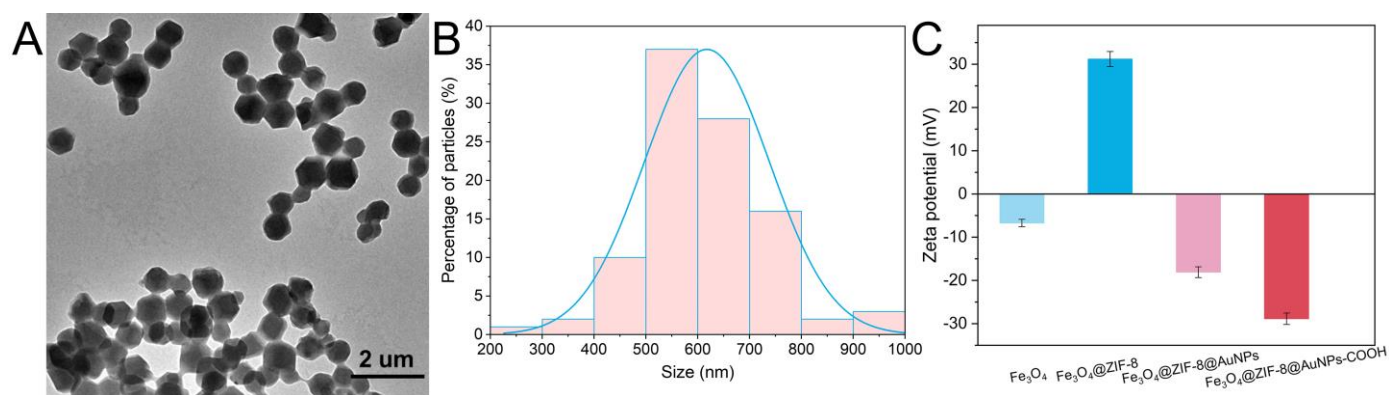

**Figure S3.** (A) TEM image and (B) size distribution of  $\text{Fe}_3\text{O}_4$ @ZIF-8@AuNPs-COOH. (C) Zeta potentials of  $\text{Fe}_3\text{O}_4$ ,  $\text{Fe}_3\text{O}_4$ @ZIF-8,  $\text{Fe}_3\text{O}_4$ @ZIF-8@AuNPs and  $\text{Fe}_3\text{O}_4$ @ZIF-8@AuNPs-COOH, respectively.

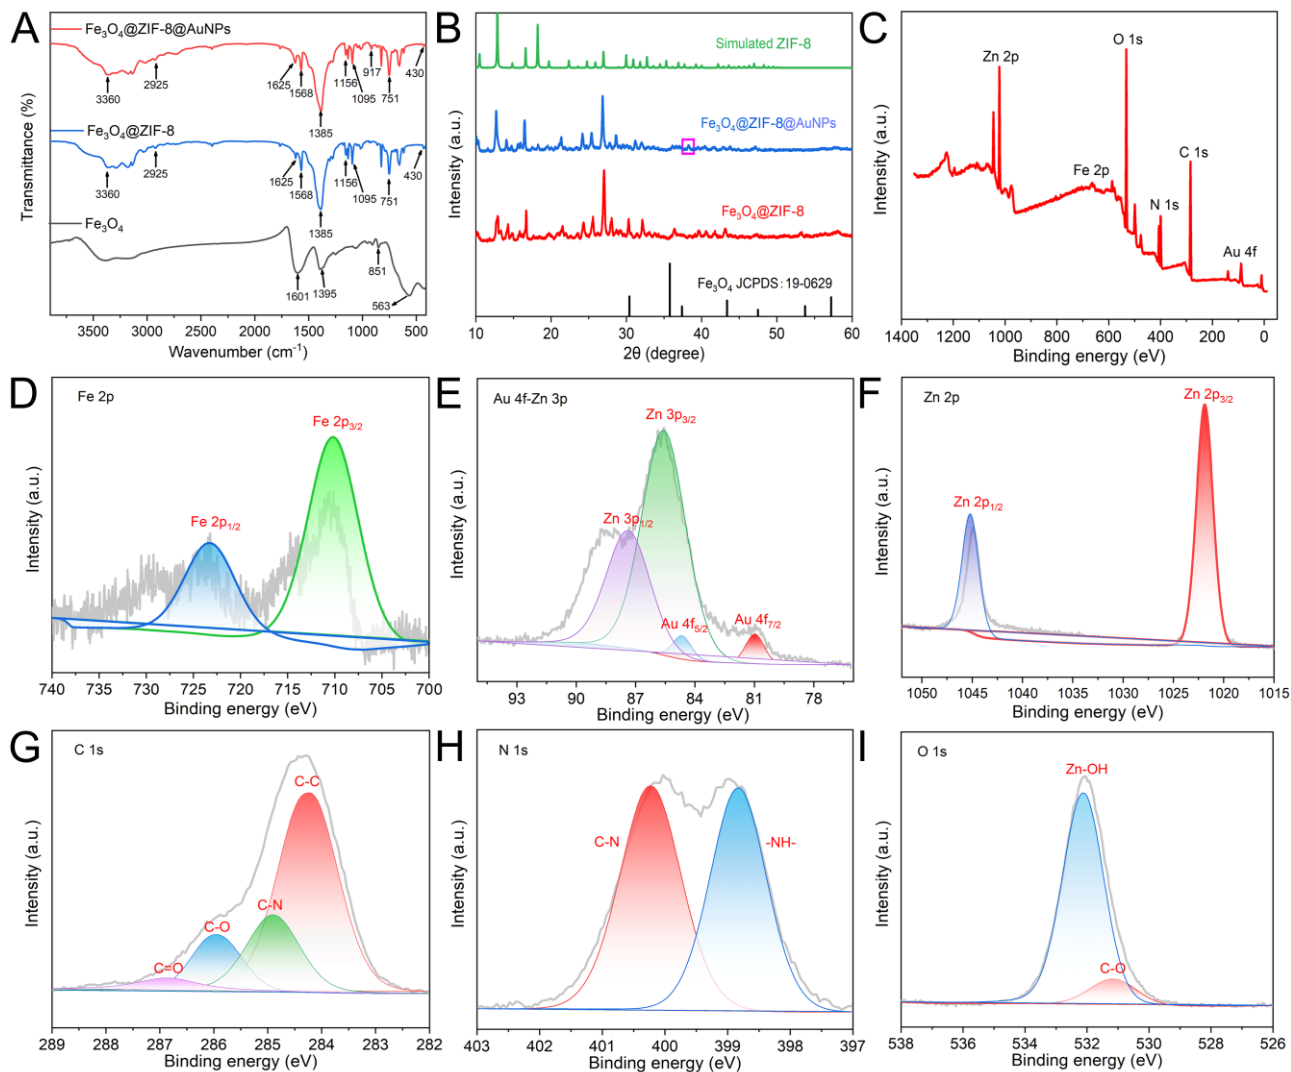

**Figure S4.** (A) FTIR spectra of  $\text{Fe}_3\text{O}_4$ ,  $\text{Fe}_3\text{O}_4@ZIF-8$  and  $\text{Fe}_3\text{O}_4@ZIF-8@AuNPs$ . (B) XRD patterns of  $\text{Fe}_3\text{O}_4@ZIF-8$  and  $\text{Fe}_3\text{O}_4@ZIF-8@AuNPs$ . (C) XPS survey spectrum of  $\text{Fe}_3\text{O}_4@ZIF-8@AuNPs-COOH$ . High-resolution XPS spectra of (D) Fe 2p, (E) Au 4f, Zn 3p, (F) Zn 2p, (G) C 1s, (H) N 1s and (I) O 1s.

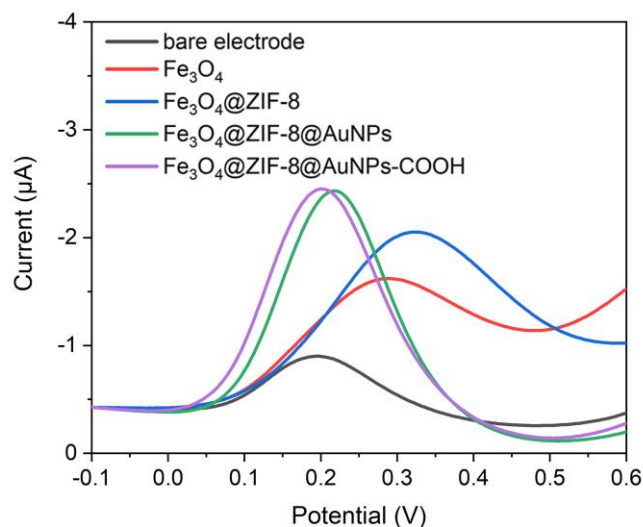

**Figure S5.** Differential pulse voltammograms of bare electrode, after modified with  $\text{Fe}_3\text{O}_4$ ,  $\text{Fe}_3\text{O}_4@ZIF-8$ ,  $\text{Fe}_3\text{O}_4@ZIF-8@AuNPs$  and  $\text{Fe}_3\text{O}_4@ZIF-8@AuNPs-COOH$  in 0.1 M PBS (pH 7.0) containing 500  $\mu\text{M}$  dopamine.

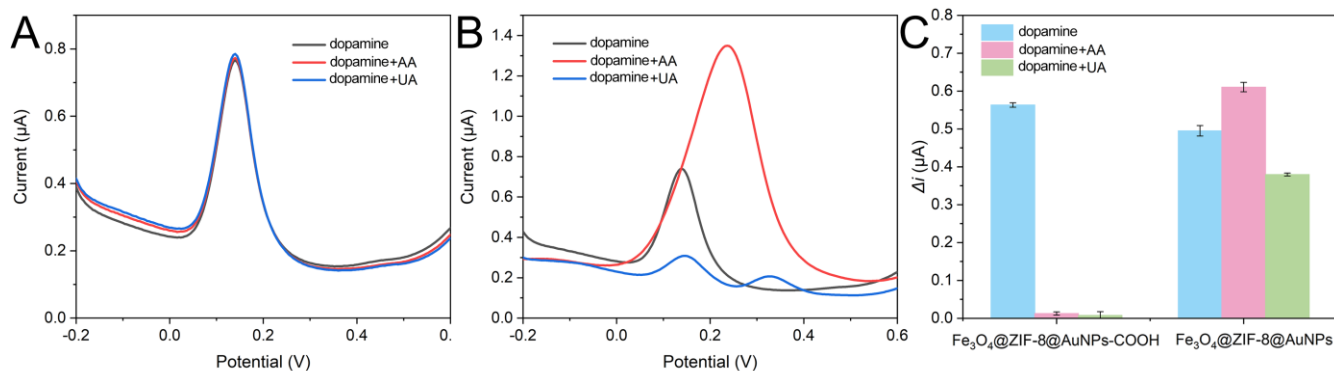

**Figure S6.** Differential pulse voltammograms of magnetic electrodes modified with (A)  $\text{Fe}_3\text{O}_4@ZIF-8@AuNPs-COOH$  and (B)  $\text{Fe}_3\text{O}_4@ZIF-8@AuNPs$  in 0.05 mM dopamine (PBS buffer) without and with AA (1 mM) or UA (1 mM). (C) The selectivity of the magnetic electrodes modified with  $\text{Fe}_3\text{O}_4@ZIF-8@AuNPs-COOH$  and  $\text{Fe}_3\text{O}_4@ZIF-8@AuNPs$  towards AA and UA.

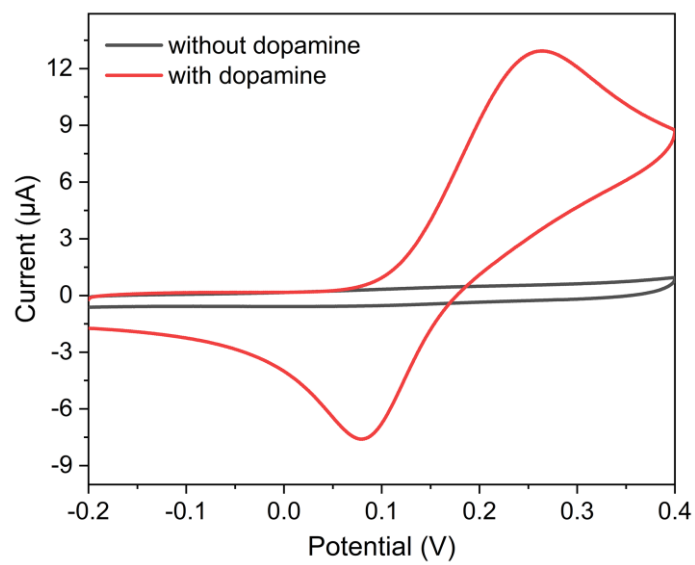

**Figure S7.** Cyclic voltammograms of magnetic electrodes modified with  $\text{Fe}_3\text{O}_4@\text{ZIF-8}@\text{AuNPs-COOH}$  in 0.1 M PBS (pH 7.0) without and with dopamine (0.1 mM).

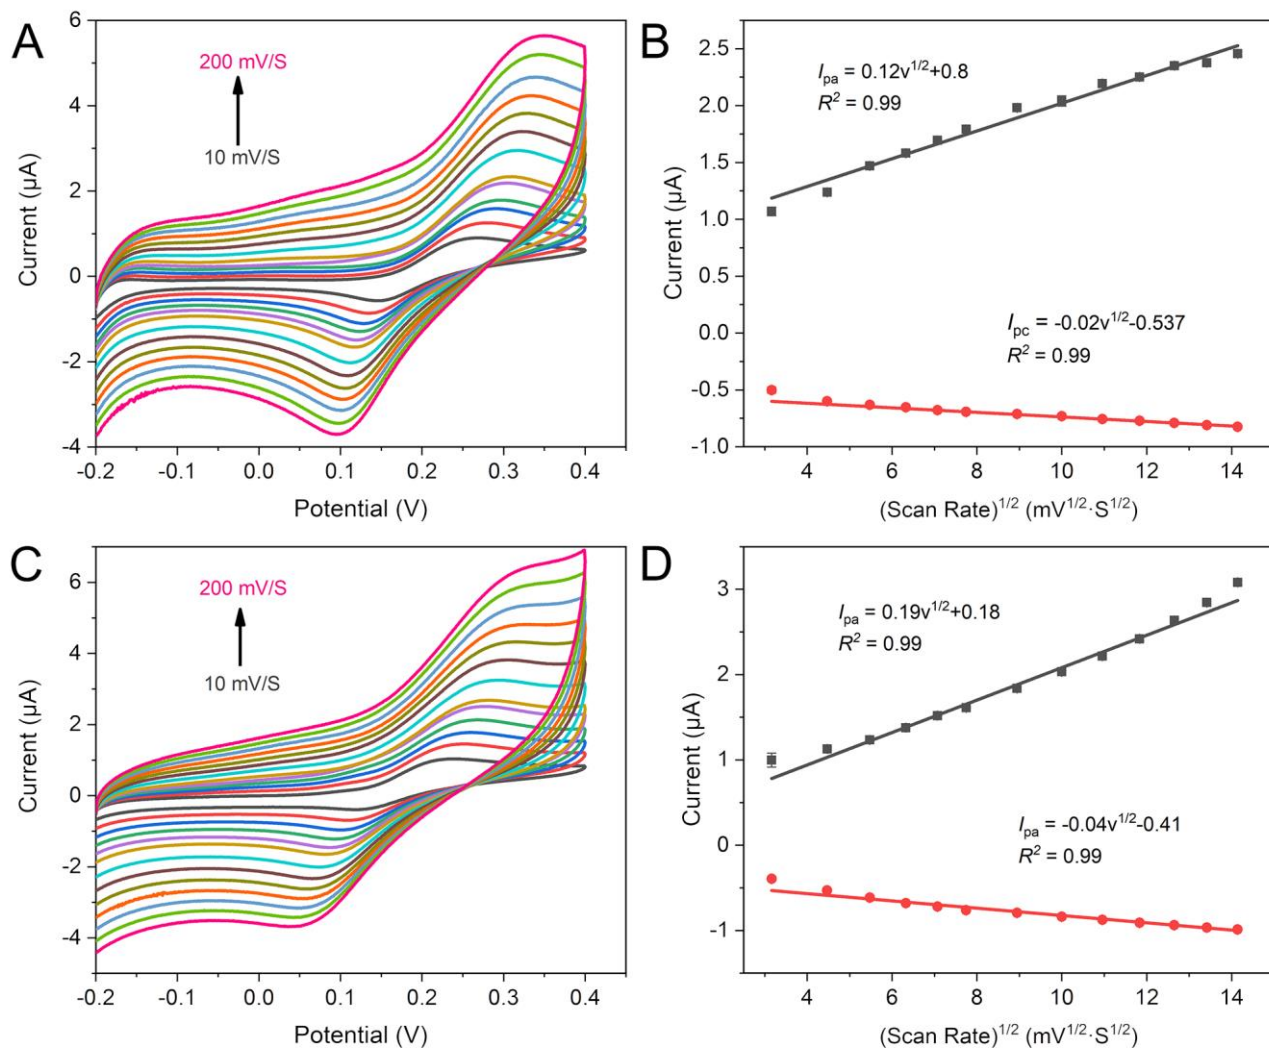

**Figure S8.** (A) Cyclic voltammograms at different scan rates (from 10 to 200 mV/s) with  $\text{Fe}_3\text{O}_4@\text{ZIF-8}$ . (B) Relationships between oxidation/reduction peaks of  $\text{Fe}_3\text{O}_4@\text{ZIF-8}$  and scan rate. (C) Cyclic voltammograms at different scan rates (from 10 to 200 mV/s) with  $\text{Fe}_3\text{O}_4@\text{ZIF-8}@\text{AuNPs}$ . (D) Relationships between oxidation/reduction peaks of  $\text{Fe}_3\text{O}_4@\text{ZIF-8}@\text{AuNPs}$  and scan rate.

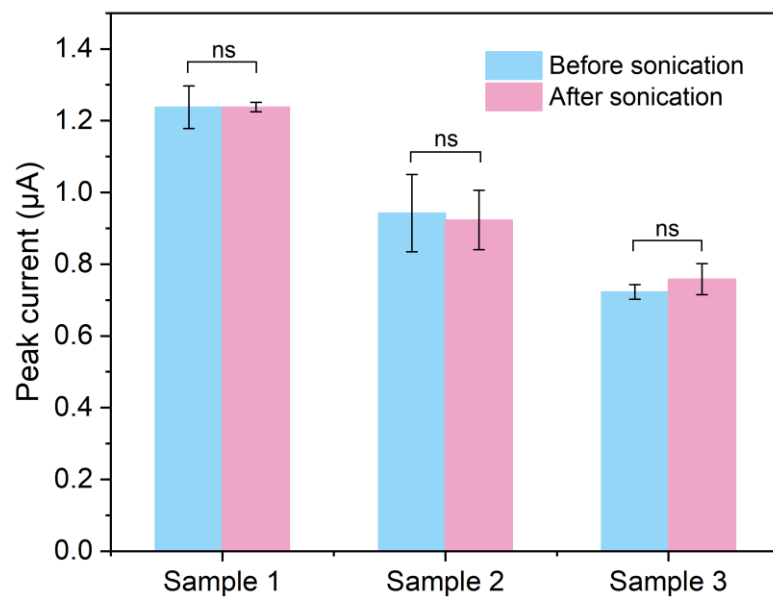

**Figure S9.** Comparison of DPV peak currents for the detection of dopamine in three samples using  $\text{Fe}_3\text{O}_4@\text{ZIF-8}@\text{AuNPs-COOH}$  without and with sonication.

**Table S1.** Comparison of different MOFs based sensors for electrochemical detection of dopamine.

| Sensor                                                   | Technique | LOD ( $\mu\text{M}$ ) | Linear range ( $\mu\text{M}$ ) | Ref       |
|----------------------------------------------------------|-----------|-----------------------|--------------------------------|-----------|
| N and Co-doped carbon particles/GCE                      | DPV       | 0.34                  | 2 - 69.5                       | 1         |
| Cu-MOFs/MWCNT-Au@Ag/GCE                                  | DPV       | 0.082                 | 0.6 - 70                       | 2         |
| Ag-ZIF-67p/GCE                                           | DPV       | 0.05                  | 0.1 - 100                      | 3         |
| $\text{Co}_3\text{O}_4/\text{NiCo}_2\text{O}_4$          | CA        | 0.241                 | 24 - 329                       | 4         |
| BC/ $\text{Co}_3\text{O}_4/\text{FeCo}_2\text{O}_4$ /GCE | DPV       | 0.04587               | 0.1 - 250                      | 5         |
| Ni-MOFs/GCE                                              | DPV       | 0.06                  | 0.2 - 100                      | 6         |
| GO-UiO-66-RT                                             | DPV       | 2.1                   | 20 - 200                       | 7         |
| $\text{Fe}_3\text{O}_4$ @ZIF-8@AuNPs-COOH                | DPV       | 0.026                 | 0.05 - 120                     | this work |

**Table S2.** Detection results of dopamine in human serums.

| Sample | Spiked ( $\mu\text{M}$ ) | Found ( $\mu\text{M}$ ) | Recovery (%) | RSD (%) |
|--------|--------------------------|-------------------------|--------------|---------|
| 1      | 1                        | 0.97                    | 97.2         | 0.5     |
| 2      | 30                       | 29.72                   | 99.1         | 0.3     |
| 3      | 50                       | 49.83                   | 99.7         | 2.3     |
| 4      | 70                       | 67.57                   | 96.5         | 3.2     |
| 5      | 100                      | 100.38                  | 100.38       | 1.4     |



## References

1. H. L. Guo, M. Wang, L. Zhao, N. Youliwasi and C. G. Liu, *Microporous Mesoporous Mater.*, 2018, **263**, 21-27.
2. W. Q. Yao, H. Guo, H. Liu, Q. Li, R. Xue, N. Wu, L. Li, M. Y. Wang and W. Yang, *J. Electrochem. Soc.*, 2019, **166**, B1258.
3. J. Tang, Y. Liu, J. Q. Hu, S. B. Zheng, X. C. Wang, H. P. Zhou and B. K. Jin, *Microchem. J.*, 2020, **155**, 104759.
4. T. J. Liu, X. Y. Zhang, K. Fu, N. Zhou, J. P. Xiong and Z. Q. Su, in *Biosensors*, 2021, vol. 11, p. 452.
5. Z. W. Lu, J. Zhong, Y. Zhang, M. M. Sun, P. Zou, H. J. Du, X. X. Wang, H. B. Rao and Y. Y. Wang, *J. Alloy. Compd.*, 2021, **858**, 157701.
6. Z. X. Huang, L. J. Zhang, P. F. Cao, N. Wang and M. Lin, *Ionics*, 2021, **27**, 1339-1345.
7. Y. N. Chang, C. H. Shen, C. W. Huang, M. D. Tsai and C. W. Kung, *ACS Appl. Nano Mater.*, 2023, **6**, 3675-3684.
